# Supplementary material for: Quorum Sensing Coordinates Cooperative Expression of Pyruvate Metabolism Genes To Maintain a Sustainable Environment for Population Stability
Source: PubMed Central journal article supplement (PMC5142617; doi:10.1128/mbio.01863-16), 2016-12-06
Supplement: mbo006163094st1.pdf [file mbo006163094st1.pdf]

## SUPPORTING INFORMATION

**Table S1. Bacterial strains used in this study.**

| Strain Number              | Relevant Genotype                                                                                 | Antibiotic Resistance(s) | Reference  |
|----------------------------|---------------------------------------------------------------------------------------------------|--------------------------|------------|
| <i>V. cholerae</i> strains |                                                                                                   |                          |            |
| WN0001                     | C6706 str2                                                                                        | SmR                      | (1)        |
| WN0072                     | $\Delta luxO$                                                                                     | SmR                      | (2)        |
| WN0778                     | $luxO^{D61E}$                                                                                     | SmR                      | (2)        |
| WN0862                     | $\Delta vpsL$                                                                                     | SmR                      | (3)        |
| WN0863                     | $luxO^{D61E} \Delta vpsL$                                                                         | SmR                      | (3)        |
| WN0865                     | $\Delta luxO \Delta vpsL$                                                                         | SmR                      | (3)        |
| WN0868                     | $\Delta luxO \Delta hapR \Delta vpsL$                                                             | SmR                      | This study |
| WN2066                     | $\Delta aphA \Delta hapR \Delta vpsL$                                                             | SmR                      | This study |
| WN2079                     | $luxO^{D61E} \Delta hapR \Delta vpsL$                                                             | SmR                      | This study |
| WN2089                     | $luxO^{D61E} \Delta aphA \Delta vpsL$                                                             | SmR                      | This study |
| WN2090                     | $\Delta luxO \Delta aphA \Delta vpsL$                                                             | SmR                      | This study |
| WN2091                     | $\Delta luxO \Delta aphA \Delta hapR \Delta vpsL$                                                 | SmR                      | This study |
| WN2092                     | $luxO^{D61E} \Delta aphA \Delta hapR \Delta vpsL$                                                 | SmR                      | This study |
| WN3126                     | $\Delta lacZ \Delta vpsL$                                                                         | SmR                      | This study |
| WN3192                     | $luxO^{D61E} \Delta aphA \Delta hapR \Delta vpsL$ pFED342                                         | KanR                     | This study |
| WN3751                     | $\Delta luxO \Delta aphA \Delta hapR \Delta vpsL$ pFED342                                         | KanR                     | This study |
| WN3779                     | $\Delta luxO \Delta lacZ \Delta vpsL$                                                             | SmR                      | This study |
| WN4102                     | $luxO^{D61E} \Delta aphA \Delta hapR \Delta vpsL$ pEVS143- <i>alsDSO</i>                          | KanR                     | This study |
| WN4171                     | $luxO^{D61E} \Delta aphA \Delta hapR \Delta vpsL$ pEVS143- <i>alsD</i>                            | KanR                     | This study |
| WN4172                     | $luxO^{D61E} \Delta aphA \Delta hapR \Delta vpsL$ pEVS143- <i>alsS</i>                            | KanR                     | This study |
| WN4173                     | $luxO^{D61E} \Delta aphA \Delta hapR \Delta vpsL$ pEVS143- <i>alsO</i>                            | KanR                     | This study |
| WN4236                     | $luxO^{D61E} \Delta aphA \Delta hapR \Delta vpsL$ pEVS143- <i>alsR</i>                            | KanR                     | This study |
| WN4405                     | $\Delta luxO \Delta aphA \Delta hapR \Delta vpsL$ pEVS141-P <sub><i>tac</i></sub> - <i>qrr4</i>   | KanR                     | This study |
| WN4446                     | $\Delta luxO \Delta aphA \Delta hapR \Delta vpsL \Delta alsDSO$                                   | SmR                      | This study |
| WN4504                     | $\Delta luxO \Delta aphA \Delta hapR \Delta vpsL$ pEVS143- <i>alsS1-gfp<sup>LVA</sup></i>         | KanR                     | This study |
| WN4509                     | $luxO^{D61E} \Delta aphA \Delta hapR \Delta vpsL$ pEVS143- <i>alsS1-gfp<sup>LVA</sup></i>         | KanR                     | This study |
| WN4938                     | $\Delta luxO \Delta aphA \Delta hapR \Delta vpsL$ pEVS143- <i>alsS3.3-gfp<sup>LVA</sup></i>       | KanR                     | This study |
| WN4940                     | $luxO^{D61E} \Delta aphA \Delta hapR \Delta vpsL$ pEVS143- <i>alsS3.3-gfp<sup>LVA</sup></i>       | KanR                     | This study |
| WN4942                     | $\Delta luxO \Delta aphA \Delta hapR \Delta vpsL$ pEVS143- <i>alsS3.4-gfp<sup>LVA</sup></i>       | KanR                     | This study |
| WN4944                     | $luxO^{D61E} \Delta aphA \Delta hapR \Delta vpsL$ pEVS143- <i>alsS3.4-gfp<sup>LVA</sup></i>       | KanR                     | This study |
| WN5109                     | $\Delta luxO \Delta aphA \Delta hapR \Delta vpsL$ pEVS143- <i>alsS3.3Mutant-gfp<sup>LVA</sup></i> | KanR                     | This study |
| WN5110                     | $luxO^{D61E} \Delta aphA \Delta hapR \Delta vpsL$ pEVS143- <i>alsS3.3Mutant-gfp<sup>LVA</sup></i> | KanR                     | This study |
| WN5221                     | $\Delta aphA \Delta hapR \Delta vpsL$ pEVS143- <i>alsS1-gfp<sup>LVA</sup></i>                     | KanR                     | This study |
| WN5224                     | $\Delta aphA \Delta hapR \Delta vpsL$ pEVS143- <i>alsS3.3-gfp<sup>LVA</sup></i>                   | KanR                     | This study |
| WN5227                     | $\Delta aphA \Delta hapR \Delta vpsL$ pEVS143- <i>alsS3.4-gfp<sup>LVA</sup></i>                   | KanR                     | This study |
| WN5230                     | $\Delta aphA \Delta hapR \Delta vpsL$ pEVS143- <i>alsS3.3Mutant-gfp<sup>LVA</sup></i>             | KanR                     | This study |

| <i>E. coli</i> strains |                                                                                        |           |            |
|------------------------|----------------------------------------------------------------------------------------|-----------|------------|
| WN0006                 | S17-1 $\lambda$ pir pKAS32                                                             | AmpR      | (4)        |
| WN0092                 | S17-1 $\lambda$ pir pEVS143                                                            | KanR      | (5)        |
| WN0479                 | S17-1 $\lambda$ pir pFED342                                                            | KanR      | (6)        |
| WN1438                 | S17-1 $\lambda$ pir pKAS32- $\Delta$ lacZ                                              | AmpR      | (7)        |
| WN3015                 | S17-1 $\lambda$ pir pEVS141-P <sub>tac</sub> - <i>qrr4</i>                             | KanR      | (8)        |
| WN4098                 | S17-1 $\lambda$ pir pEVS143- <i>alsDSO</i>                                             | KanR      | This study |
| WN4143                 | S17-1 $\lambda$ pir pEVS143- <i>alsD</i>                                               | KanR      | This study |
| WN4145                 | S17-1 $\lambda$ pir pEVS143- <i>alsS</i>                                               | KanR      | This study |
| WN4147                 | S17-1 $\lambda$ pir pEVS143- <i>alsO</i>                                               | KanR      | This study |
| WN4210                 | S17-1 $\lambda$ pir pEVS143- <i>alsR</i>                                               | KanR      | This study |
| WN4379                 | S17-1 $\lambda$ pir pKAS32- $\Delta$ <i>alsDSO</i>                                     | AmpR      | This study |
| WN4493                 | S17-1 $\lambda$ pir pEVS143- <i>alsS1-gfp</i> <sup>LVA</sup>                           | KanR      | This study |
| WN4522                 | S17-1 $\lambda$ pir pEVS143- <i>gfp</i> <sup>LVA</sup>                                 | KanR      | This study |
| WN4531                 | S17-1 $\lambda$ pir pEVS143- <i>alsS1-gfp</i> <sup>LVA</sup> and pRHA109               | KanR AmpR | This study |
| WN4534                 | S17-1 $\lambda$ pir pEVS143- <i>gfp</i> <sup>LVA</sup> and pRHA109                     | KanR AmpR | This study |
| WN4559                 | S17-1 $\lambda$ pir pRHA109                                                            | AmpR      | (9)        |
| WN4689                 | S17-1 $\lambda$ pir pRHA109- <i>qrr4</i>                                               | AmpR      | This study |
| WN4694                 | S17-1 $\lambda$ pir pEVS143- <i>alsS1-gfp</i> <sup>LVA</sup> and pRHA109 <i>qrr4</i>   | KanR AmpR | This study |
| WN4699                 | S17-1 $\lambda$ pir pEVS143- <i>gfp</i> <sup>LVA</sup> and pRHA109 <i>qrr4</i>         | KanR AmpR | This study |
| WN4776                 | S17-1 $\lambda$ pir pEVS143- <i>alsS3.3-gfp</i> <sup>LVA</sup>                         | KanR      | This study |
| WN4792                 | S17-1 $\lambda$ pir pEVS143- <i>alsS3.3-gfp</i> <sup>LVA</sup> and pRHA109             | KanR AmpR | This study |
| WN4796                 | S17-1 $\lambda$ pir pEVS143- <i>alsS3.3-gfp</i> <sup>LVA</sup> and pRHA109 <i>qrr4</i> | KanR AmpR | This study |
| WN4819                 | S17-1 $\lambda$ pir pEVS143- <i>alsS3.4-gfp</i> <sup>LVA</sup>                         | KanR      | This study |
| WN4830                 | S17-1 $\lambda$ pir pEVS143- <i>alsS3.4-gfp</i> <sup>LVA</sup> and pRHA109             | KanR AmpR | This study |
| WN4834                 | S17-1 $\lambda$ pir pEVS143- <i>alsS3.4-gfp</i> <sup>LVA</sup> and pRHA109 <i>qrr4</i> | KanR AmpR | This study |
| WN5085                 | S17-1 $\lambda$ pir pEVS143- <i>alsS3.3Mutant-gfp</i> <sup>LVA</sup>                   | KanR      | This study |

## References

1. Thelin KH & Taylor RK (1996) Toxin-coregulated pilus, but not mannose-sensitive hemagglutinin, is required for colonization by *Vibrio cholerae* O1 El Tor biotype and O139 strains. *Infect Immun* 64(7):2853-2856.
2. Hammer BK & Bassler BL (2009) Distinct sensory pathways in *Vibrio cholerae* El Tor and classical biotypes modulate cyclic dimeric GMP levels to control biofilm formation. *J Bacteriol* 191(1):169-177.
3. Waters CM, Lu W, Rabinowitz JD, & Bassler BL (2008) Quorum sensing controls biofilm formation in *Vibrio cholerae* through modulation of cyclic di-GMP levels and repression of *vpsT*. *J Bacteriol* 190(7):2527-2536.
4. Skorupski K & Taylor RK (1996) Positive selection vectors for allelic exchange. *Gene* 169(1):47-52.
5. Bose JL, Rosenberg CS, & Stabb EV (2008) Effects of *luxCDABEG* induction in *Vibrio fischeri*: enhancement of symbiotic colonization and conditional attenuation of growth in culture. *Arch Microbiol* 190(2):169-183.
6. Svenningsen SL, Waters CM, & Bassler BL (2008) A negative feedback loop involving small RNAs accelerates *Vibrio cholerae*'s transition out of quorum-sensing mode. *Genes Dev* 22(2):226-238.

7. Miller MB, Skorupski K, Lenz DH, Taylor RK, & Bassler BL (2002) Parallel quorum sensing systems converge to regulate virulence in *Vibrio cholerae*. *Cell* 110(3):303-314
8. Svenningsen SL, Tu KC, & Bassler BL (2009) Gene dosage compensation calibrates four regulatory RNAs to control *Vibrio cholerae* quorum sensing. *EMBO J* 28(4):429-439
9. Giacalone MJ, *et al.* (2006) Toxic protein expression in *Escherichia coli* using a rhamnose-based tightly regulated and tunable promoter system. *Biotechniques* 40(3):355-364.
