# Supplementary material for: Quorum Sensing Coordinates Cooperative Expression of Pyruvate Metabolism Genes To Maintain a Sustainable Environment for Population Stability
Source: PubMed Central journal article supplement (PMC5142617; doi:10.1128/mbio.01863-16), 2016-12-06
Supplement: mbo006163094st2.pdf [file mbo006163094st2.pdf]

Table S2A - Chemomx Analysis of *ΔvpsL* strains

|                | Media (0 Hrs) | WT 8 Hrs |       | WT 19 Hrs |       | HCD 8 Hrs |      | HCD 19 Hrs |      | LCD 8 Hrs |      | LCD 19 Hrs |      | HCD/WT 8 Hrs | HCD/WT 19 Hrs | LCD/WT 8 Hrs | LCD/WT 19 Hrs | HCD/LCD 8 Hrs | HCD/LCD 19 Hrs | LCD/HCD 8 Hrs | LCD/HCD 19 Hrs |     |
|----------------|---------------|----------|-------|-----------|-------|-----------|------|------------|------|-----------|------|------------|------|--------------|---------------|--------------|---------------|---------------|----------------|---------------|----------------|-----|
|                | [mM]          | [mM]     | +/-   | [mM]      | +/-   | [mM]      | +/-  | [mM]       | +/-  | [mM]      | +/-  | [mM]       | +/-  | Fold Change  | Fold Change   | Fold Change  | Fold Change   | Fold Change   | Fold Change    | Fold Change   | Fold Change    |     |
| 2,3 Butanediol | N/D           | 0.684    | 0.268 | 3.617     | 1.085 | 0.32      | 0.01 | 2.18       | 0.09 | 0.09      | 0.01 | 0.70       | 0.04 | 0.46         | 0.60          | 0.13         | 0.19          | 3.70          | 3.09           | 0.27          | 0.32           |     |
| Acetate        | 0.10          | 3.892    | 0.352 | 3.131     | 0.492 | 2.89      | 0.04 | 3.72       | 0.24 | 5.14      | 0.13 | 7.75       | 0.21 | 0.74         | 1.19          | 1.32         | 2.47          | 0.56          | 0.48           | 1.78          | 2.08           |     |
| Acetoin        | N/D           | 0.516    | 0.216 | 0.755     | 0.295 | 0.30      | 0.03 | 0.93       | 0.04 | 0.05      | 0.00 | 0.26       | 0.02 | 0.58         | 1.24          | 0.09         | 0.35          | 6.57          | 3.57           | 0.15          | 0.28           |     |
| Alanine        | 0.36          | 0.262    | 0.019 | 0.330     | 0.006 | 0.27      | 0.01 | 0.29       | 0.02 | 0.30      | 0.00 | 0.35       | 0.01 | 1.03         | 0.88          | 1.13         | 1.07          | 0.91          | 0.83           | 1.10          | 1.21           |     |
| Aspartate      | 0.58          | 0.065    | 0.017 | 0.039     | 0.009 | 0.04      | 0.00 | 0.04       | 0.01 | 0.04      | 0.00 | 0.04       | 0.00 | 0.63         | 1.15          | 0.60         | 1.03          | 1.05          | 1.12           | 0.95          | 0.89           |     |
| Ethanol        | N/D           | 3.843    | 0.660 | 7.622     | 0.998 | 2.27      | 0.05 | 4.86       | 0.24 | 3.41      | 0.09 | 5.07       | 0.12 | 0.59         | 0.64          | 0.89         | 0.67          | 0.66          | 0.96           | 1.51          | 1.04           |     |
| Formate        | 0.02          | 7.784    | 0.795 | 12.030    | 0.412 | 4.72      | 0.14 | 8.24       | 0.47 | 7.89      | 0.21 | 10.62      | 0.29 | 0.61         | 0.68          | 1.01         | 0.88          | 0.60          | 0.78           | 1.67          | 1.29           |     |
| Glucose        | 27.74         | 14.518   | 0.497 | 4.129     | 3.184 | 17.69     | 0.20 | 8.23       | 0.48 | 15.85     | 0.20 | 10.50      | 0.24 | 1.22         | 1.99          | 1.09         | 2.54          | 1.12          | 0.78           | 0.90          | 1.28           |     |
| Glutamate      | 1.01          | 0.486    | 0.136 | 0.544     | 0.168 | 0.72      | 0.02 | 0.71       | 0.03 | 0.76      | 0.00 | 0.68       | 0.04 | 1.49         | 1.31          | 1.57         | 1.26          | 0.95          | 1.04           | 1.05          | 0.96           |     |
| Glycine        | 0.22          | 0.111    | 0.003 | 0.146     | 0.014 | 0.10      | 0.00 | 0.10       | 0.01 | 0.10      | 0.01 | 0.13       | 0.01 | 0.91         | 0.70          | 0.91         | 0.89          | 1.00          | 0.79           | 1.00          | 1.26           |     |
| Isoleucine     | 0.21          | 0.193    | 0.023 | 0.201     | 0.016 | 0.21      | 0.02 | 0.16       | 0.01 | 0.18      | 0.00 | 0.16       | 0.01 | 1.08         | 0.78          | 0.91         | 0.81          | 1.19          | 0.97           | 0.84          | 1.03           |     |
| Lactate        | 0.01          | 0.171    | 0.036 | 0.385     | 0.062 | 0.03      | 0.00 | 0.16       | 0.01 | 0.64      | 0.01 | 3.63       | 0.09 | 0.18         | 0.43          | 3.75         | 9.42          | 0.05          | 0.05           | 21.38         | 22.08          |     |
| Leucine        | 0.53          | 0.419    | 0.046 | 0.452     | 0.027 | 0.42      | 0.00 | 0.37       | 0.01 | 0.40      | 0.01 | 0.43       | 0.01 | 1.01         | 0.81          | 0.97         | 0.94          | 1.04          | 0.86           | 0.96          | 1.17           |     |
| Lysine         | 0.04          | 0.163    | 0.069 | 0.246     | 0.110 | 0.23      | 0.00 | 0.20       | 0.03 | 0.25      | 0.03 | 0.07       | 0.01 | 1.40         | 0.80          | 1.52         | 0.28          | 0.92          | 2.83           | 1.09          | 0.35           |     |
| Methionine     | 0.11          | 0.137    | 0.017 | 0.135     | 0.019 | 0.12      | 0.00 | 0.11       | 0.00 | 0.11      | 0.01 | 0.11       | 0.00 | 0.87         | 0.79          | 0.77         | 0.81          | 1.13          | 0.98           | 0.88          | 1.02           |     |
| Phenylalanine  | 0.14          | 0.139    | 0.025 | 0.152     | 0.011 | 0.12      | 0.00 | 0.12       | 0.01 | 0.12      | 0.00 | 0.12       | 0.00 | 0.86         | 0.79          | 0.87         | 0.77          | 0.99          | 1.03           | 1.01          | 0.97           |     |
| Proline        | 0.62          | 0.336    | 0.057 | 0.282     | 0.031 | 0.41      | 0.08 | 0.46       | 0.02 | 0.40      | 0.03 | 0.32       | 0.03 | 1.23         | 1.65          | 1.19         | 1.15          | 1.03          | 1.43           | 0.97          | 0.70           |     |
| Pyroglutamate  | 0.71          | 0.415    | 0.033 | 0.406     | 0.043 | 0.54      | 0.02 | 0.54       | 0.01 | 0.44      | 0.02 | 0.41       | 0.06 | 1.29         | 1.34          | 1.05         | 1.01          | 1.22          | 1.33           | 0.82          | 0.75           |     |
| Pyruvate       | N/D           | 0.111    | 0.031 | 0.057     | 0.006 | 0.12      | 0.00 | 0.05       | 0.00 | 1.11      | 0.01 | 0.88       | 0.04 | 1.05         | 0.89          | 9.98         | 15.36         | 0.11          | 0.06           | 9.51          | 17.28          |     |
| Serine         | 0.05          | N/D      | N/D   | N/D       | N/D   | N/D       | N/D  | N/D        | N/D  | N/D       | N/D  | N/D        | N/D  | N/D          | N/D           | N/D          | N/D           | N/D           | N/D            | N/D           | N/D            | N/D |
| Succinate      | N/D           | 0.764    | 0.172 | 1.991     | 0.461 | 0.53      | 0.01 | 1.47       | 0.05 | 0.53      | 0.02 | 1.06       | 0.03 | 0.70         | 0.74          | 0.69         | 0.53          | 1.01          | 1.39           | 0.99          | 0.72           |     |
| Threonine      | 0.23          | 0.078    | 0.027 | 0.078     | 0.027 | 0.18      | 0.00 | 0.03       | 0.03 | 0.07      | 0.02 | 0.10       | 0.00 | 2.28         | 0.44          | 0.91         | 1.31          | 2.51          | 0.33           | 0.40          | 3.00           |     |
| Tyrosine       | 0.08          | 0.083    | 0.015 | 0.091     | 0.007 | 0.07      | 0.00 | 0.08       | 0.00 | 0.07      | 0.00 | 0.07       | 0.00 | 0.82         | 0.83          | 0.82         | 0.80          | 1.00          | 1.04           | 1.00          | 0.96           |     |
| Valine         | 0.36          | 0.324    | 0.032 | 0.338     | 0.019 | 0.33      | 0.01 | 0.27       | 0.01 | 0.30      | 0.01 | 0.26       | 0.04 | 1.02         | 0.79          | 0.91         | 0.78          | 1.12          | 1.01           | 0.90          | 0.99           |     |

Table S2B - Bayesian Analysis of  $\Delta vpsL$  strains

|               | Media (0 Hrs) | WT 8 Hrs |      | WT 19 Hrs |      | HCD 8 Hrs |      | HCD 19 Hrs |      | LCD 8 Hrs |      | LCD 19 Hrs |      | HCD/WT<br>8 Hrs | HCD/WT<br>19 Hrs | LCD/WT<br>8 Hrs | LCD/WT<br>19 Hrs | HCD/LCD<br>8 Hrs | HCD/LCD<br>19 Hrs | LCD/HCD<br>8 Hrs | LCD/HCD<br>19 Hrs |     |
|---------------|---------------|----------|------|-----------|------|-----------|------|------------|------|-----------|------|------------|------|-----------------|------------------|-----------------|------------------|------------------|-------------------|------------------|-------------------|-----|
|               | [mM]          | [mM]     | +/-  | [mM]      | +/-  | [mM]      | +/-  | [mM]       | +/-  | [mM]      | +/-  | [mM]       | +/-  | Fold<br>Change  | Fold<br>Change   | Fold<br>Change  | Fold<br>Change   | Fold<br>Change   | Fold<br>Change    | Fold<br>Change   | Fold<br>Change    |     |
| Acetate       | 0.02          | 2.71     | 0.24 | 2.12      | 0.31 | 0.89      | 0.02 | 1.15       | 0.07 | 1.60      | 0.03 | 2.43       | 0.06 | 0.33            | 0.54             | 0.59            | 1.14             | 0.55             | 0.48              | 1.80             | 2.10              |     |
| Acetoacetate  | N/D           | N/D      | N/D  | N/D       | N/D  | N/D       | N/D  | N/D        | N/D  | N/D       | N/D  | N/D        | N/D  | N/D             | N/D              | N/D             | N/D              | N/D              | N/D               | N/D              | N/D               | N/D |
| Acetone       | N/D           | 0.28     | 0.12 | 0.42      | 0.16 | 0.12      | 0.00 | 0.49       | 0.02 | 0.02      | 0.00 | 0.14       | 0.01 | 0.41            | 1.15             | 0.08            | 0.32             | 5.30             | 3.60              | 0.19             | 0.28              |     |
| Alanine       | 0.14          | 0.17     | 0.01 | 0.23      | N/D  | 0.11      | 0.00 | 0.13       | 0.01 | 0.14      | 0.00 | 0.17       | 0.00 | 0.66            | 0.57             | 0.83            | 0.75             | 0.79             | 0.76              | 1.26             | 1.32              |     |
| Arginine      | 0.05          | 0.03     | 0.03 | 0.04      | 0.04 | N/D       | N/D  | 0.03       | 0.02 | 0.02      | 0.02 | N/D        | N/D  | N/D             | 0.85             | 0.84            | N/D              | N/D              | N/D               | N/D              | N/D               |     |
| Asparagine    | 0.05          | 0.02     | 0.01 | 0.02      | 0.01 | 0.02      | 0.01 | 0.02       | 0.01 | 0.02      | 0.01 | 0.02       | 0.00 | 1.12            | 0.83             | 0.86            | 0.74             | 1.30             | 1.12              | 0.77             | 0.89              |     |
| Aspartate     | 0.60          | 0.03     | 0.02 | 0.02      | 0.01 | 0.04      | 0.01 | 0.01       | 0.00 | 0.02      | 0.00 | 0.03       | 0.00 | 1.25            | 0.41             | 0.71            | 1.51             | 1.77             | 0.27              | 0.57             | 3.67              |     |
| Ethanol       | 0.03          | 4.29     | 0.65 | 8.56      | 1.17 | 2.16      | 0.06 | 4.88       | 0.28 | 3.20      | 0.06 | 5.16       | 0.10 | 0.50            | 0.57             | 0.75            | 0.60             | 0.67             | 0.95              | 1.49             | 1.06              |     |
| Formate       | 0.02          | 8.36     | 0.79 | 12.48     | 0.68 | 4.53      | 0.11 | 7.84       | 0.45 | 7.52      | 0.16 | 10.11      | 0.30 | 0.54            | 0.63             | 0.90            | 0.81             | 0.60             | 0.78              | 1.66             | 1.29              |     |
| Glucose       | 25.82         | 13.69    | 0.51 | 3.89      | 3.29 | 14.98     | 0.35 | 6.33       | 0.60 | 13.43     | 0.03 | 8.64       | 0.09 | 1.09            | 1.63             | 0.98            | 2.22             | 1.12             | 0.73              | 0.90             | 1.36              |     |
| Glutamic acid | 1.82          | 0.91     | 0.10 | 0.99      | 0.02 | 1.30      | 0.02 | 1.45       | 0.17 | 1.33      | 0.01 | 1.12       | 0.08 | 1.43            | 1.46             | 1.45            | 1.12             | 0.98             | 1.30              | 1.02             | 0.77              |     |
| Glutamine     | 0.31          | 0.07     | 0.01 | N/D       | N/D  | 0.01      | 0.01 | 0.04       | 0.02 | 0.07      | 0.02 | 0.36       | 0.08 | 0.09            | N/D              | 0.97            | N/D              | 0.09             | 0.10              | 11.16            | 9.64              |     |
| Glycine       | 0.67          | 0.03     | 0.02 | 0.06      | 0.04 | 0.06      | 0.02 | 0.03       | 0.02 | 0.11      | 0.01 | 0.03       | 0.02 | 1.73            | 0.57             | 3.24            | 0.54             | 0.53             | 1.06              | 1.87             | 0.94              |     |
| Histidine     | 0.24          | N/D      | N/D  | N/D       | N/D  | 0.07      | 0.04 | 0.07       | 0.04 | 0.08      | 0.02 | 0.06       | 0.02 | N/D             | N/D              | N/D             | N/D              | 0.83             | 1.15              | 1.20             | 0.87              |     |
| Isoleucine    | 0.30          | 0.24     | 0.03 | 0.20      | 0.04 | 0.19      | 0.01 | 0.17       | 0.01 | 0.20      | 0.00 | 0.17       | 0.01 | 0.77            | 0.86             | 0.82            | 0.85             | 0.95             | 1.01              | 1.05             | 0.99              |     |
| Lactate       | 0.03          | 0.16     | 0.04 | 0.34      | 0.08 | 0.09      | 0.01 | 0.21       | 0.01 | 0.91      | 0.05 | 4.55       | 0.10 | 0.59            | 0.61             | 5.82            | 13.42            | 0.10             | 0.05              | 9.91             | 21.98             |     |
| Leucine       | 0.61          | 0.45     | 0.05 | 0.43      | 0.04 | 0.38      | 0.01 | 0.36       | 0.03 | 0.40      | 0.00 | 0.36       | 0.01 | 0.84            | 0.84             | 0.89            | 0.84             | 0.94             | 1.00              | 1.06             | 1.00              |     |
| Lysine        | 0.28          | 0.28     | 0.03 | 0.44      | 0.03 | 0.26      | 0.01 | 0.27       | 0.00 | 0.22      | 0.04 | 0.35       | 0.01 | 0.92            | 0.63             | 0.79            | 0.81             | 1.16             | 0.78              | 0.86             | 1.29              |     |
| Malonate      | 0.14          | 0.02     | 0.01 | 0.01      | N/D  | 0.02      | 0.00 | 0.01       | 0.00 | 0.02      | 0.00 | 0.01       | 0.00 | 0.66            | 1.04             | 0.66            | 1.31             | 1.00             | 0.79              | 1.00             | 1.27              |     |
| Methionine    | 0.10          | 0.11     | 0.01 | 0.12      | N/D  | 0.10      | 0.00 | 0.09       | 0.00 | 0.09      | 0.00 | 0.10       | 0.00 | 0.93            | 0.80             | 0.84            | 0.86             | 1.10             | 0.94              | 0.91             | 1.07              |     |
| Phenylalanine | 0.16          | 0.13     | 0.01 | 0.15      | N/D  | 0.12      | 0.00 | 0.12       | 0.01 | 0.11      | 0.00 | 0.12       | 0.00 | 0.88            | 0.80             | 0.84            | 0.82             | 1.05             | 0.98              | 0.95             | 1.02              |     |
| Proline       | 0.63          | 0.36     | 0.02 | 0.27      | 0.07 | 0.39      | 0.02 | 0.28       | 0.01 | 0.12      | 0.01 | 0.23       | 0.06 | 1.08            | 1.02             | 0.33            | 0.85             | 3.24             | 1.20              | 0.31             | 0.83              |     |
| Pyruvic acid  | 0.02          | 0.04     | N/D  | 0.04      | 0.01 | 0.12      | 0.00 | 0.03       | 0.01 | 1.03      | 0.01 | 0.84       | 0.10 | 2.66            | 0.73             | 23.67           | 19.40            | 0.11             | 0.04              | 8.91             | 26.42             |     |
| Serine        | 1.51          | 0.03     | 0.03 | 0.07      | 0.04 | N/D       | N/D  | N/D        | N/D  | N/D       | N/D  | N/D        | N/D  | N/D             | N/D              | N/D             | N/D              | N/D              | N/D               | N/D              | N/D               |     |
| Succinate     | 0.10          | 0.92     | 0.21 | 0.57      | 0.04 | 0.57      | 0.01 | 1.55       | 0.06 | 0.59      | 0.02 | 0.04       | 0.02 | 0.62            | 2.73             | 0.64            | 0.08             | 0.96             | 35.39             | 1.04             | 0.03              |     |
| Threonine     | 0.24          | 0.15     | 0.01 | 0.10      | 0.01 | 0.17      | 0.00 | 0.12       | 0.01 | 0.13      | 0.00 | 0.22       | 0.04 | 1.15            | 1.17             | 0.89            | 2.16             | 1.30             | 0.54              | 0.77             | 1.84              |     |
| Tryptophan    | 0.04          | 0.02     | N/D  | 0.02      | N/D  | 0.02      | 0.00 | 0.02       | 0.00 | 0.02      | 0.00 | 0.01       | 0.00 | 1.20            | 0.83             | 1.11            | 0.52             | 1.09             | 1.59              | 0.92             | 0.63              |     |
| Tyrosine      | 0.03          | 0.08     | 0.01 | 0.09      | N/D  | 0.02      | 0.00 | 0.02       | 0.00 | 0.02      | 0.00 | 0.02       | 0.00 | 0.25            | 0.27             | 0.26            | 0.24             | 0.96             | 1.11              | 1.04             | 0.90              |     |
| Valine        | 0.37          | 0.35     | 0.04 | 0.34      | 0.01 | 0.30      | 0.00 | 0.31       | 0.02 | 0.27      | 0.00 | 0.28       | 0.01 | 0.86            | 0.92             | 0.78            | 0.82             | 1.11             | 1.12              | 0.90             | 0.90              |     |

Table S2C - Chemomx Analysis of  $\Delta$ aphA  $\Delta$ hapR  $\Delta$ vpsL strains

|                | Media (0 Hrs) |       | WT 8 Hrs |      | WT 19 Hrs |      | HCD 8 Hrs |       | HCD 19 Hrs |       | LCD 8 Hrs |       | LCD 19 Hrs |       | HCD/WT<br>8 Hrs | HCD/WT<br>19 Hrs | LCD/WT<br>8 Hrs | LCD/WT<br>19 Hrs | HCD/LCD<br>8 Hrs | HCD/LCD<br>19 Hrs | LCD/HCD<br>8 Hrs | LCD/HCD<br>19 Hrs |
|----------------|---------------|-------|----------|------|-----------|------|-----------|-------|------------|-------|-----------|-------|------------|-------|-----------------|------------------|-----------------|------------------|------------------|-------------------|------------------|-------------------|
|                | [mM]          | +/-   | [mM]     | +/-  | [mM]      | +/-  | [mM]      | +/-   | [mM]       | +/-   | [mM]      | +/-   | [mM]       | +/-   | Fold<br>Change  | Fold<br>Change   | Fold<br>Change  | Fold<br>Change   | Fold<br>Change   | Fold<br>Change    | Fold<br>Change   | Fold<br>Change    |
| 2,3 Butanediol | N/D           | N/D   | 0.68     | 0.04 | 4.18      | 0.16 | 1.093     | 0.175 | 4.418      | 0.418 | 0.342     | 0.062 | 1.357      | 0.149 | 1.60            | 1.06             | 0.50            | 0.32             | 3.20             | 3.26              | 0.31             | 0.31              |
| Acetate        | 0.089         | 0.011 | 3.57     | 0.07 | 3.42      | 0.16 | 3.391     | 0.107 | 1.814      | 0.065 | 6.013     | 0.488 | 7.313      | 0.604 | 0.95            | 0.53             | 1.68            | 2.14             | 0.56             | 0.25              | 1.77             | 4.03              |
| Acetoin        | N/D           | N/D   | 0.35     | 0.04 | 0.98      | 0.04 | 0.729     | 0.150 | 1.620      | 0.488 | 0.261     | 0.065 | 0.263      | 0.056 | 2.07            | 1.66             | 0.74            | 0.27             | 2.79             | 6.16              | 0.36             | 0.16              |
| Alanine        | 0.360         | 0.019 | 0.23     | 0.01 | 0.27      | 0.01 | 0.286     | 0.007 | 0.250      | 0.031 | 0.324     | 0.008 | 0.357      | 0.048 | 1.22            | 0.91             | 1.38            | 1.30             | 0.88             | 0.70              | 1.13             | 1.43              |
| Aspartate      | 0.576         | 0.030 | 0.04     | 0.00 | 0.04      | 0.00 | 0.060     | 0.014 | 0.040      | 0.006 | 0.060     | 0.014 | 0.040      | 0.006 | 1.51            | 1.01             | 1.51            | 1.01             | 1.00             | 1.00              | 1.00             | 1.00              |
| Ethanol        | N/D           | N/D   | 3.14     | 0.11 | 6.73      | 0.29 | 4.101     | 0.173 | 8.195      | 0.495 | 4.484     | 0.303 | 6.411      | 0.288 | 1.31            | 1.22             | 1.43            | 0.95             | 0.91             | 1.28              | 1.09             | 0.78              |
| Formate        | 0.032         | 0.005 | 6.12     | 0.13 | 10.23     | 0.49 | 7.386     | 0.206 | 10.759     | 0.466 | 10.024    | 0.424 | 12.356     | 0.386 | 1.21            | 1.05             | 1.64            | 1.21             | 0.74             | 0.87              | 1.36             | 1.15              |
| Glucose        | 28.374        | 1.052 | 14.76    | 0.16 | 1.58      | 0.42 | 16.552    | 1.047 | 6.482      | N/D   | 17.467    | 0.338 | 9.943      | 0.885 | 1.12            | 4.11             | 1.18            | 6.30             | 0.95             | 0.65              | 1.06             | 1.53              |
| Glutamate      | 0.979         | 0.074 | 0.74     | 0.03 | 0.74      | 0.05 | 0.680     | 0.153 | 0.744      | 0.049 | 0.665     | 0.149 | 0.567      | 0.158 | 0.92            | 1.00             | 0.90            | 0.76             | 1.02             | 1.31              | 0.98             | 0.76              |
| Glycine        | 0.212         | 0.012 | 0.09     | 0.01 | 0.12      | 0.01 | 0.122     | 0.010 | 0.128      | 0.015 | 0.130     | 0.014 | 0.142      | 0.011 | 1.42            | 1.06             | 1.52            | 1.17             | 0.94             | 0.90              | 1.07             | 1.11              |
| Isoleucine     | 0.203         | 0.008 | 0.16     | 0.00 | 0.17      | 0.02 | 0.216     | 0.006 | 0.217      | 0.012 | 0.216     | 0.007 | 0.228      | 0.002 | 1.39            | 1.27             | 1.39            | 1.34             | 1.00             | 0.95              | 1.00             | 1.06              |
| Lactate        | 0.181         | 0.010 | 0.03     | 0.00 | 0.14      | 0.01 | 0.121     | 0.042 | 0.117      | 0.032 | 0.307     | 0.052 | 2.950      | 0.194 | 4.49            | 0.84             | 11.42           | 21.09            | 0.39             | 0.04              | 2.55             | 25.13             |
| Leucine        | 0.498         | 0.025 | 0.31     | 0.05 | 0.39      | 0.02 | 0.474     | 0.012 | 0.425      | 0.032 | 0.459     | 0.050 | 0.433      | 0.026 | 1.51            | 1.08             | 1.46            | 1.10             | 1.03             | 0.98              | 0.97             | 1.02              |
| Lysine         | 0.359         | 0.021 | 0.17     | 0.01 | 0.05      | 0.01 | 0.200     | 0.055 | 0.221      | 0.104 | 0.209     | 0.059 | 0.218      | 0.109 | 1.20            | 4.01             | 1.25            | 3.97             | 0.96             | 1.01              | 1.04             | 0.99              |
| Methionine     | 0.116         | 0.014 | 0.09     | 0.00 | 0.10      | 0.01 | 0.136     | 0.017 | 0.140      | 0.018 | 0.136     | 0.017 | 0.135      | 0.017 | 1.43            | 1.37             | 1.43            | 1.32             | 1.00             | 1.04              | 1.00             | 0.96              |
| Phenylalanine  | 0.157         | 0.004 | 0.11     | 0.00 | 0.13      | 0.01 | 0.130     | 0.015 | 0.147      | 0.009 | 0.147     | 0.009 | 0.147      | 0.009 | 1.23            | 1.17             | 1.40            | 1.17             | 0.88             | 1.00              | 1.14             | 1.00              |
| Proline        | 0.581         | 0.036 | 0.41     | 0.02 | 0.38      | 0.04 | 0.473     | 0.048 | 0.418      | 0.068 | 0.367     | 0.063 | 0.399      | 0.064 | 1.16            | 1.10             | 0.90            | 1.05             | 1.29             | 1.05              | 0.78             | 0.96              |
| Pyroglutamate  | 0.590         | 0.051 | 0.50     | 0.02 | 0.43      | 0.00 | 0.642     | 0.122 | 0.431      | 0.015 | 0.445     | 0.034 | 0.462      | 0.036 | 1.27            | 1.01             | 0.88            | 1.08             | 1.44             | 0.93              | 0.69             | 1.07              |
| Pyruvate       | N/D           | N/D   | 0.19     | 0.03 | 0.01      | 0.00 | 0.063     | N/D   | 0.051      | 0.011 | 0.796     | 0.154 | 0.850      | 0.139 | 0.34            | 3.53             | 4.27            | 58.59            | 0.08             | 0.06              | 12.64            | 16.58             |
| Serine         | 0.389         | 0.027 | N/D      | N/D  | N/D       | N/D  | N/D       | N/D   | N/D        | N/D   | N/D       | N/D   | N/D        | N/D   | N/D             | N/D              | N/D             | N/D              | N/D              | N/D               | N/D              | N/D               |
| Succinate      | N/D           | N/D   | 0.57     | 0.02 | 2.00      | 0.07 | 0.780     | 0.059 | 2.040      | 0.255 | 0.745     | 0.081 | 1.319      | 0.110 | 1.36            | 1.02             | 1.30            | 0.66             | 1.05             | 1.55              | 0.96             | 0.65              |
| Threonine      | 0.239         | 0.023 | 0.14     | 0.01 | 0.07      | 0.03 | 0.104     | 0.033 | 0.083      | 0.038 | 0.135     | 0.061 | 0.071      | 0.020 | 0.75            | 1.21             | 0.97            | 1.04             | 0.77             | 1.16              | 1.30             | 0.86              |
| Tyrosine       | 0.081         | 0.007 | 0.06     | 0.00 | 0.08      | 0.01 | 0.082     | 0.010 | 0.091      | 0.005 | 0.091     | 0.005 | 0.091      | 0.005 | 1.30            | 1.21             | 1.43            | 1.21             | 0.91             | 1.00              | 1.10             | 1.00              |
| Valine         | 0.340         | 0.018 | 0.31     | 0.01 | 0.33      | 0.02 | 0.369     | 0.012 | 0.347      | 0.019 | 0.352     | 0.022 | 0.351      | 0.028 | 1.20            | 1.04             | 1.14            | 1.06             | 1.05             | 0.99              | 0.95             | 1.01              |

Table S2D - Bayesian Analysis of  $\Delta\text{aphA}$   $\Delta\text{hapR}$   $\Delta\text{vpsL}$  strains

|               | Media (0 Hrs) |      | WT 8 Hrs |      | WT 19 Hrs |      | HCD 8 Hrs |      | HCD 19 Hrs |      | LCD 8 Hrs |      | LCD 19 Hrs |      | HCD/WT<br>8 Hrs | HCD/WT<br>19 Hrs | LCD/WT<br>8 Hrs | LCD/WT<br>19 Hrs | HCD/LCD<br>8 Hrs | HCD/LCD<br>19 Hrs | LCD/HCD<br>8 Hrs | LCD/HCD<br>19 Hrs |
|---------------|---------------|------|----------|------|-----------|------|-----------|------|------------|------|-----------|------|------------|------|-----------------|------------------|-----------------|------------------|------------------|-------------------|------------------|-------------------|
|               | [mM]          | +/-  | [mM]     | +/-  | [mM]      | +/-  | [mM]      | +/-  | [mM]       | +/-  | [mM]      | +/-  | [mM]       | +/-  | Fold<br>Change  | Fold<br>Change   | Fold<br>Change  | Fold<br>Change   | Fold<br>Change   | Fold<br>Change    | Fold<br>Change   | Fold<br>Change    |
| Acetate       | 0.04          | 0.01 | 1.10     | 0.03 | 1.06      | 0.04 | 2.24      | 0.04 | 1.28       | 0.07 | 4.04      | 0.30 | 2.53       | 1.14 | 2.03            | 1.21             | 3.67            | 2.39             | 0.55             | 0.51              | 1.81             | 1.98              |
| Acetoacetate  | 0.01          | 0.01 | N/D      | N/D  | N/D       | N/D  | N/D       | N/D  | 0.01       | 0.01 | N/D       | N/D  | N/D        | N/D  | N/D             | N/D              | N/D             | N/D              | N/D              | N/D               | N/D              | N/D               |
| Acetone       | N/D           | N/D  | 0.17     | 0.01 | 0.52      | 0.02 | 0.41      | 0.10 | 0.97       | 0.29 | 0.13      | 0.03 | 0.39       | 0.25 | 2.39            | 1.86             | 0.74            | 0.76             | 3.22             | 2.46              | 0.31             | 0.41              |
| Alanine       | 0.22          | 0.02 | 0.11     | 0.00 | 0.13      | 0.01 | 0.18      | 0.01 | 0.16       | 0.02 | 0.24      | 0.01 | 0.24       | 0.03 | 1.61            | 1.26             | 2.23            | 1.89             | 0.72             | 0.67              | 1.38             | 1.50              |
| Arginine      | 0.07          | 0.04 | N/D      | N/D  | N/D       | N/D  | N/D       | N/D  | 0.01       | 0.01 | 0.01      | 0.01 | 0.02       | 0.02 | N/D             | N/D              | N/D             | N/D              | N/D              | 0.72              | N/D              | 1.38              |
| Asparagine    | 0.05          | 0.01 | 0.01     | 0.00 | 0.02      | 0.01 | 0.02      | N/D  | 0.02       | N/D  | 0.03      | 0.01 | 0.02       | N/D  | 1.30            | 0.90             | 1.94            | 0.78             | 0.67             | 1.16              | 1.49             | 0.86              |
| Aspartate     | 0.62          | 0.06 | 0.03     | 0.00 | 0.03      | 0.00 | 0.03      | 0.01 | 0.04       | N/D  | 0.03      | N/D  | 0.03       | 0.01 | 0.99            | 1.42             | 1.03            | 0.95             | 0.96             | 1.50              | 1.04             | 0.67              |
| Ethanol       | 0.02          | 0.01 | 2.97     | 0.13 | 6.21      | 0.09 | 4.50      | 0.38 | 9.27       | 0.95 | 4.91      | 0.36 | 7.52       | 0.82 | 1.52            | 1.49             | 1.66            | 1.21             | 0.92             | 1.23              | 1.09             | 0.81              |
| Formate       | 0.03          | 0.01 | 5.76     | 0.15 | 9.71      | 0.44 | 7.64      | 0.40 | 11.98      | 0.96 | 10.42     | 0.64 | 12.39      | 0.80 | 1.33            | 1.23             | 1.81            | 1.28             | 0.73             | 0.97              | 1.36             | 1.03              |
| Glucose       | 28.77         | 2.46 | 12.78    | 0.36 | 1.06      | 0.33 | 15.04     | 0.32 | 1.43       | 1.41 | 15.83     | 0.39 | 6.23       | 2.15 | 1.18            | 1.34             | 1.24            | 5.87             | 0.95             | 0.23              | 1.05             | 4.37              |
| Glutamic acid | 1.15          | 0.06 | 1.46     | 0.05 | 1.65      | 0.08 | 1.04      | 0.05 | 1.15       | 0.14 | 0.91      | 0.02 | 0.81       | 0.08 | 0.71            | 0.70             | 0.63            | 0.49             | 1.14             | 1.42              | 0.87             | 0.71              |
| Glutamine     | 0.07          | 0.02 | 0.02     | 0.01 | 0.07      | 0.04 | 0.02      | 0.02 | 0.11       | 0.06 | 0.03      | 0.02 | 0.17       | 0.12 | 1.37            | 1.53             | 1.99            | 2.49             | 0.68             | 0.61              | 1.46             | 1.63              |
| Glycine       | 0.39          | 0.15 | N/D      | N/D  | 0.04      | 0.03 | N/D       | N/D  | 0.09       | 0.03 | 0.05      | 0.03 | 0.02       | 0.01 | N/D             | 2.03             | N/D             | 0.41             | N/D              | 5.00              | N/D              | 0.20              |
| Histidine     | 0.03          | 0.01 | 0.11     | 0.01 | 0.07      | 0.01 | N/D       | N/D  | 0.01       | N/D  | N/D       | N/D  | 0.01       | N/D  | N/D             | 0.08             | N/D             | 0.09             | N/D              | 0.84              | N/D              | 1.19              |
| Isoleucine    | 0.32          | 0.04 | 0.17     | 0.01 | 0.19      | 0.02 | 0.23      | 0.01 | 0.33       | 0.05 | 0.25      | 0.01 | 0.26       | 0.02 | 1.34            | 1.69             | 1.45            | 1.34             | 0.92             | 1.26              | 1.08             | 0.79              |
| Lactate       | 0.06          | 0.05 | 0.12     | 0.01 | 0.20      | 0.02 | 0.09      | 0.03 | 0.10       | 0.05 | 0.34      | 0.04 | 1.71       | 0.55 | 0.77            | 0.50             | 2.91            | 8.37             | 0.26             | 0.06              | 3.78             | 16.81             |
| Leucine       | 0.54          | 0.05 | 0.38     | 0.03 | 0.29      | 0.03 | 0.47      | 0.03 | 0.48       | 0.04 | 0.46      | 0.02 | 0.45       | 0.03 | 1.25            | 1.65             | 1.22            | 1.57             | 1.03             | 1.06              | 0.97             | 0.95              |
| Lysine        | 0.32          | 0.03 | 0.22     | 0.02 | 0.45      | 0.02 | 0.32      | 0.02 | 0.54       | 0.03 | 0.34      | 0.05 | 0.48       | 0.05 | 1.42            | 1.18             | 1.51            | 1.06             | 0.94             | 1.12              | 1.07             | 0.89              |
| Malonate      | 0.17          | 0.03 | 0.02     | 0.00 | 0.01      | 0.00 | 0.02      | N/D  | 0.01       | N/D  | 0.02      | N/D  | 0.01       | N/D  | 1.11            | 0.97             | 1.33            | 1.85             | 0.84             | 0.52              | 1.19             | 1.91              |
| Methionine    | 0.11          | 0.03 | 0.09     | 0.01 | 0.10      | 0.00 | 0.12      | 0.01 | 0.11       | 0.01 | 0.12      | 0.01 | 0.12       | 0.01 | 1.26            | 1.14             | 1.27            | 1.18             | 0.99             | 0.96              | 1.01             | 1.04              |
| Phenylalanine | 0.18          | 0.02 | 0.11     | 0.00 | 0.12      | 0.01 | 0.14      | N/D  | 0.16       | 0.02 | 0.15      | 0.01 | 0.15       | 0.01 | 1.28            | 1.32             | 1.34            | 1.24             | 0.96             | 1.06              | 1.04             | 0.94              |
| Proline       | 0.66          | 0.11 | 0.25     | 0.01 | 0.33      | 0.03 | 0.46      | 0.02 | 0.45       | 0.07 | 0.26      | 0.03 | 0.15       | 0.06 | 1.89            | 1.37             | 1.06            | 0.46             | 1.78             | 2.99              | 0.56             | 0.33              |
| Pyruvic acid  | N/D           | N/D  | 0.19     | 0.02 | N/D       | N/D  | 0.01      | N/D  | 0.01       | N/D  | 0.78      | 0.13 | 0.61       | 0.24 | 0.07            | N/D              | 4.16            | N/D              | 0.02             | 0.01              | 62.47            | 71.09             |
| Serine        | 1.54          | 0.24 | 0.02     | 0.01 | 0.02      | 0.02 | 0.02      | 0.01 | 0.01       | 0.01 | N/D       | N/D  | 0.01       | 0.01 | 0.79            | 0.61             | N/D             | 0.56             | N/D              | 1.08              | N/D              | 0.92              |
| Succinate     | 0.11          | 0.01 | 0.61     | 0.02 | 2.10      | 0.07 | 0.90      | 0.08 | 2.42       | 0.32 | 0.67      | 0.06 | 1.03       | 0.61 | 1.48            | 1.15             | 1.10            | 0.49             | 1.34             | 2.34              | 0.74             | 0.43              |
| Threonine     | 0.25          | 0.02 | 0.13     | 0.00 | 0.06      | 0.01 | 0.17      | 0.01 | 0.08       | 0.02 | 0.16      | N/D  | 0.24       | 0.08 | 1.31            | 1.27             | 1.29            | 3.77             | 1.02             | 0.34              | 0.98             | 2.96              |
| Tryptophan    | 0.06          | 0.02 | 0.02     | 0.00 | 0.01      | 0.00 | 0.01      | N/D  | 0.02       | 0.01 | 0.02      | N/D  | 0.02       | 0.01 | 0.80            | 2.29             | 1.03            | 1.59             | 0.77             | 1.44              | 1.29             | 0.70              |
| Tyrosine      | 0.09          | 0.01 | 0.02     | 0.00 | 0.02      | 0.00 | 0.08      | N/D  | 0.09       | 0.01 | 0.09      | N/D  | 0.09       | N/D  | 4.51            | 3.81             | 4.98            | 3.98             | 0.91             | 0.96              | 1.10             | 1.05              |
| Valine        | 0.37          | 0.03 | 0.27     | 0.01 | 0.26      | 0.04 | 0.40      | 0.02 | 0.44       | 0.06 | 0.37      | 0.02 | 0.34       | 0.05 | 1.50            | 1.68             | 1.38            | 1.30             | 1.09             | 1.29              | 0.92             | 0.77              |
